# Supplementary material for: A computer-based solution to the oxidation kinetics of fluorinated and oxygenated volatile organic compounds
Source: Royal Society of Chemistry journal article supplement (doi:10.1039/d2ea00164k), 2023-01-01
Supplement: d2ea00164k1.zip [file d2ea00164k1.zip]

# Electronic Supplementary Information for:

A computer-based solution to the oxidation kinetics of fluorinated and oxygenated volatile organic compounds

Luís P. Viegas<sup>\*a</sup> and Frank Jensen<sup>b</sup>

<sup>a</sup> Coimbra Chemistry Centre-Institute of Molecular Sciences (CQC-IMS), Department of Chemistry, University of Coimbra, 3004-535 Coimbra, Portugal; E-mail: [lpviegas@ci.uc.pt](mailto:lpviegas@ci.uc.pt)

<sup>b</sup> Chemistry Department, Aarhus University, DK-8000 Aarhus, Denmark.

The .zip file contains the Cartesian coordinates for all reactants and transition states used in the calculations of the rate coefficients, along with the corresponding values for the partition functions, electronic energies and zero-point energy values at the M08-HX/pcseg-2 level of theory.
